# Supplementary material for: Characterization of Gelatin and Hydrolysates from Valorization of Farmed Salmon Skin By-Products
Source: MDPI journal article supplement (doi:10.3390/polym13162828), 2021-08-23
Supplement: s1 [file s1]

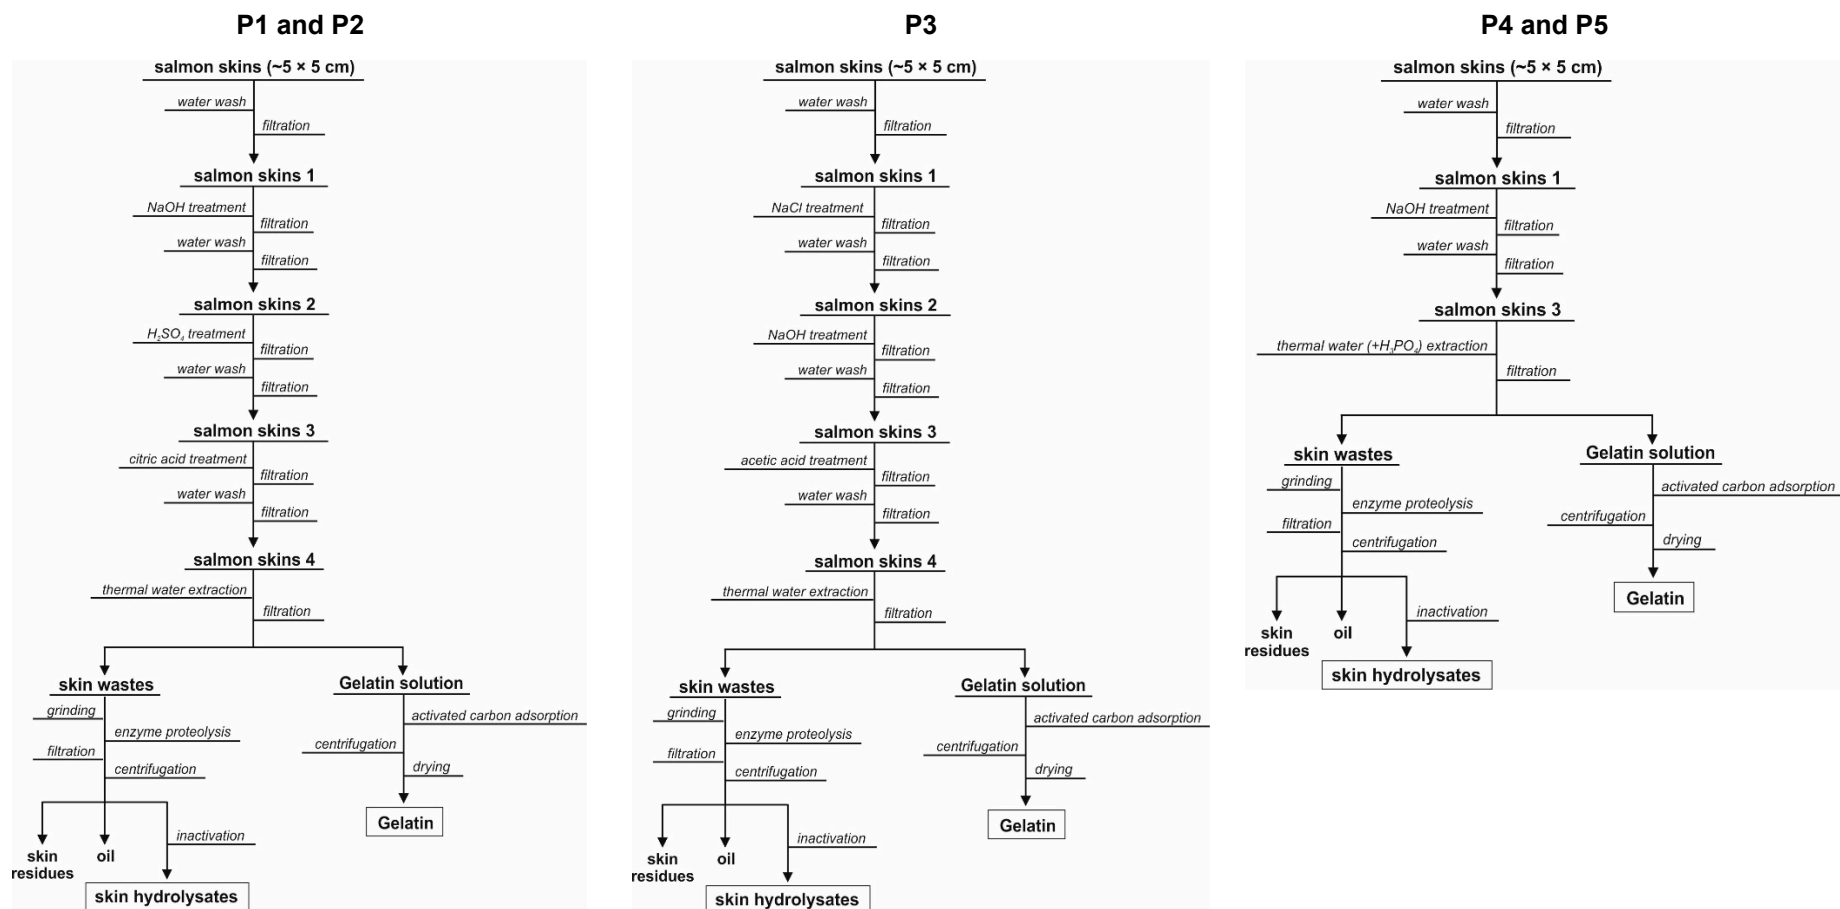

**Figure S1.** Flowcharts summarizing the protocols studied for the production of gelatins from salmon skin by-products. Chemical treatments in P1 and P2 were run at 22°C and 4°C, respectively. Chemical treatments in P4 and P5 were run at 22°C and 4°C, respectively.

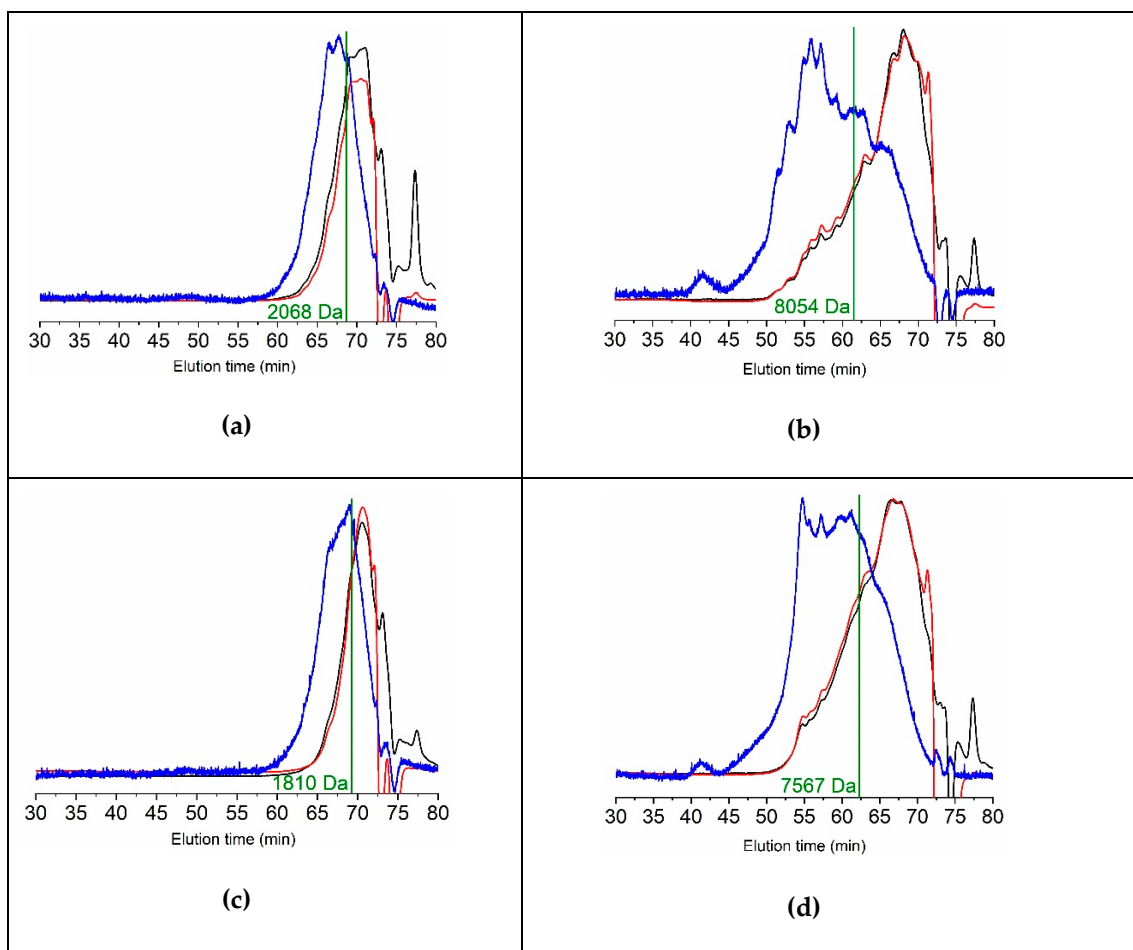

**Figure S2.** GPC eluograms of hydrolysates of salmon skin after gelatine extraction. **(a)** CH1: alcalase 2h; **(b)** alcalase 4h; **(c)** papain 2h; **(d)** papain 4h. Blue line: right angle light scattering; red line: refractive index; black line: ultraviolet (232 nm).

**Table S1.** Values obtained from TGA and DTGA analysis of salmon gelatin P1. Onset temperatures,  $T_{\text{onset}}$ ; maximum temperatures,  $T_{\text{max}}$ ; and *Weight loss (%)* at 5 °C/min.

| Steps | $T_{\text{Onset}}$ (°C) | $T_{\text{max}}$ (°C) | <i>Weight loss (%)</i> |
|-------|-------------------------|-----------------------|------------------------|
| 1     | 39.6                    | 103                   | -7.6                   |
| 2     | 252                     | 303                   | -62.8                  |

**Table S2.** Values obtained from the analysis of DSC of salmon gelatin P1. Onset temperatures,  $T_{\text{onset}}$ ; maximum temperatures,  $T_{\text{max}}$ ; and enthalpy,  $\Delta H$ , at 5 °C/min.

| Point | $T_{\text{Onset}}$ (°C) | $T_{\text{max}}$ (°C) | $\Delta H$ (J/g) |
|-------|-------------------------|-----------------------|------------------|
| 1     | 20.6                    | 86.5                  | 75.94            |
| 2     | 233.8                   | 292.5                 | 286.97           |
